# Supplementary material for: Activity of Antioxidant Enzymes and Their Association with Lipid Profile in Mexican People without Cardiovascular Disease: An Analysis of Interactions
Source: MDPI journal article supplement (doi:10.3390/ijerph15122687), 2018-11-28
Supplement: s1 [file s1]

**Table S1.** Analysis of the activity of antioxidant enzymes and FRAP according to factors associated with dyslipidemia or antioxidant enzyme activity.

|                   |                | Catalase        |               |             |                  |                 |
|-------------------|----------------|-----------------|---------------|-------------|------------------|-----------------|
|                   |                | PON1 Activity   | SOD1 Activity | Activity    | Milliequivalents | Ceruloplasmin   |
| Factor            |                | (U/ml)          | (U/mg)        | (k/mg)      | of Trolox (μM)   | activity (U/ml) |
| Physical activity | Low            | 273.13 ± 114.89 | 10.71 ± 2.87  | 0.38 ± 0.20 | 960.36 ± 356.28  | 2.26 ± 0.36     |
|                   | Moderate       | 284.08 ± 144.66 | 10.87 ± 2.63  | 0.32 ± 0.17 | 992.15 ± 361.08  | 2.29 ± 0.31     |
|                   | High           | 264.90 ± 130.43 | 11.26 ± 2.99  | 0.33 ± 0.18 | 1054.39 ± 405.82 | 2.29 ± 0.32     |
|                   | p-value        | 0.245           | 0.156         | 0.064       | 0.070            | 0.774           |
| Smoking habit     | Nonsmoker      | 274.84 ± 135.41 | 11.10 ± 2.89  | 0.33 ± 0.18 | 980.96 ± 363.89  | 2.28 ± 0.32     |
|                   | Current smoker | 281.32 ± 134.29 | 11.13 ± 2.84  | 0.32 ± 0.17 | 1073.15 ± 446.22 | 2.31 ± 0.33     |
|                   | Ex-smoker      | 260.87 ± 136.27 | 10.69 ± 2.63  | 0.32 ± 0.17 | 1094.86 ± 359.11 | 2.29 ± 0.33     |
|                   | p-value        | 0.504           | 0.385         | 0.625       | 0.005            | 0.601           |
| Gender            | Women          | 268.98 ± 133.42 | 11.34 ± 3.03  | 0.32 ± 0.18 | 921.37 ± 326.65  | 2.28 ± 0.30     |
|                   | Men            | 282.05 ± 138.26 | 10.53 ± 2.39  | 0.34 ± 0.17 | 1184.91 ± 416.27 | 2.30 ± 0.36     |
|                   | p-value        | 0.244           | 0.001         | 0.028       | <0.001           | 0.354           |
| Alcohol consumer  | Yes            | 271.05 ± 133.26 | 10.96 ± 2.91  | 0.32 ± 0.17 | 1030.68 ± 393.38 | 2.27 ± 0.30     |
|                   | No             | 280.82 ± 140.39 | 11.25 ± 2.63  | 0.35 ± 0.18 | 987.79 ± 356.98  | 2.30 ± 0.33     |
|                   | p-value        | 0.417           | 0.255         | 0.145       | 0.209            | 0.341           |
| Age               | Correlation    | -0.32           | 0.040         | 0.034       | -0.089           | 0.001           |
|                   | p-value        | 0.430           | 0.315         | 0.393       | 0.025            | 0.970           |
| Caloric intake    | Correlation    | 0.081           | -0.091        | 0.059       | 0.131            | 0.021           |
|                   | p-value        | 0.042           | 0.022         | 0.138       | 0.001            | 0.597           |

Categorical variables with more than two categories were compared using one-way ANOVA or the Kruskal–Wallis test (according to the fulfillment of the correspondent assumptions), whereas those with two categories were compared by Student’s *t*-test or the Mann–Whitney U-test (according to the fulfillment of the correspondent assumptions). For continuous variables a Pearson correlation test was used without adjustment for other covariates.

**Table S2.** Association between antioxidant enzyme activities and FRAP.

|                   |                 | PON1     | SOD1     | Catalase |                  |                 |
|-------------------|-----------------|----------|----------|----------|------------------|-----------------|
|                   |                 | Activity | Activity | Activity | Milliequivalents | Ceruloplasmin   |
| Parameter         |                 | (U/ml)   | (U/mg)   | (k/mg)   | of Trolox (μM)   | activity (U/ml) |
| PON1 activity     | Correlation     | -        | -.095    | .058     | -.192            | -.080           |
| (U/ml)            | <i>p</i> -value | -        | .018     | .151     | .000             | .046            |
| SOD1 activity     | Correlation     | -.095    | -        | .267     | .105             | .114            |
| (U/mg)            | <i>p</i> -value | .018     | -        | .000     | .009             | .004            |
| Catalase activity | Correlation     | .058     | .267     | -        | -.452            | -.028           |
| (k/mg)            | <i>p</i> -value | .151     | .000     | -        | .000             | .485            |
| Milliequivalents  | Correlation     | -.192    | .105     | -.452    | -                | .022            |
| of Trolox (μM)    | <i>p</i> -value | .000     | .009     | .000     | -                | .577            |
| Ceruloplasmin     | Correlation     | -.080    | .114     | -.028    | .022             | -               |
| activity (U/ml)   | <i>p</i> -value | .046     | .004     | .485     | .577             | -               |

The correlations are the results from a partial correlation analysis adjusted by age, gender, tobacco smoking, alcohol use, physical activity, and caloric intake.

**Table S3.** Results from the linear regression models considering the main effects of the components of lipid profiles and their association with the activity of superoxide dismutase-1, catalase, and FRAP.

| Parameter                       | Term in the Equation | Unadjusted $\beta$<br>Coefficient (95%CI) | Unadjusted<br>Standardize<br>d $\beta$<br>Coefficient | <i>p</i> -<br>Value | Adjusted $\beta$<br>Coefficient (95%CI) | Adjusted<br>Standardize<br>d $\beta$<br>Coefficient | <i>p</i> -<br>Value |
|---------------------------------|----------------------|-------------------------------------------|-------------------------------------------------------|---------------------|-----------------------------------------|-----------------------------------------------------|---------------------|
| Superoxide<br>dismutase-1       | ↑TG                  | 0.12 (-1.09, 1.33)                        | 0.020                                                 | 0.845               | 0.56 (-0.66, 1.79)                      | 0.095                                               | 0.369               |
|                                 | ↑LDLC                | 0.20 (-0.55, 0.96)                        | 0.034                                                 | 0.599               | 0.14 (-0.63, 0.91)                      | 0.024                                               | 0.718               |
|                                 | ↓HDL                 | -0.08 (-0.76, 0.61)                       | -0.013                                                | 0.826               | -0.17 (-0.85, 0.51)                     | -0.029                                              | 0.629               |
|                                 | ↑TGx↑LDLC            | -0.87 (-2.42, 0.68)                       | -0.120                                                | 0.272               | -0.95 (-2.49, 0.59)                     | -0.132                                              | 0.227               |
|                                 | ↑TGx↓HDL             | -0.101 (-1.56, 1.36)                      | -0.015                                                | 0.893               | -0.35 (-1.81, 1.11)                     | -0.047                                              | 0.640               |
|                                 | ↑LDLCx↓HDL           | 0.72 (-0.69, 2.13)                        | 0.088                                                 | 0.319               | 0.73 (-0.67, 2.13)                      | 0.090                                               | 0.306               |
|                                 | ↑TGx↑LDLCx↓HDL       | -0.39 (-2.56, 1.78)                       | -0.041                                                | 0.726               | -0.32 (-2.45, 1.84)                     | -0.033                                              | 0.771               |
| Log catalase<br>activity        | ↑TG                  | 0.03 (-0.08, 0.12)                        | 0.051                                                 | 0.627               | -0.01(-0.11, 0.09)                      | -0.013                                              | 0.809               |
|                                 | ↑LDLC                | -0.01 (-0.07,0.05)                        | -0.018                                                | 0.778               | -0.02 (-0.08, 0.05)                     | -0.030                                              | 0.651               |
|                                 | ↓HDL                 | -0.04 (-0.09, 0.02)                       | -0.077                                                | 0.207               | -0.04 (-0.09, 0.02)                     | -0.077                                              | 0.209               |
|                                 | ↑TGx↑LDLC            | 0.01 (-0.12, 0.14)                        | 0.016                                                 | 0.883               | 0.03 (-0.10, 0.16)                      | 0.049                                               | 0.656               |
|                                 | ↑TGx↓HDL             | -0.00 (-0.13, 0.12)                       | -0.008                                                | 0.944               | 0.01 (-0.11, 0.13)                      | 0.023                                               | 0.837               |
|                                 | ↑LDLCx↓HDL           | 0.05 (-0.07, 0.16)                        | 0.069                                                 | 0.437               | 0.05 (-0.07, 0.17)                      | 0.076                                               | 0.389               |
|                                 | ↑TGx↑LDLCx↓HDL       | -0.06 (-0.24, 0.12)                       | -0.073                                                | 0.531               | -0.07 (-0.25, 0.11)                     | -0.092                                              | 0.428               |
| Log ferric-<br>reducing ability | ↑TG                  | 0.04 (-0.02, 0.11)                        | 0.136                                                 | 0.183               | 0.02 (-0.05, 0.08)                      | 0.048                                               | 0.624               |
|                                 | ↑LDLC                | 0.01 (-0.03, 0.05)                        | 0.028                                                 | 0.665               | 0.03 (-0.01, 0.07)                      | 0.093                                               | 0.132               |
|                                 | ↓HDL                 | 0.01 (-0.03, 0.05)                        | 0.030                                                 | 0.615               | 0.03 (-0.10, 0.06)                      | 0.081                                               | 0.153               |
|                                 | ↑TGx↑LDLC            | 0.03 (-0.06,0.11)                         | 0.065                                                 | 0.547               | 0.01 (-0.07, 0.09)                      | 0.022                                               | 0.831               |
|                                 | ↑TGx↓HDL             | 0.02 (-0.06,0.10)                         | 0.066                                                 | 0.543               | 0.04 (-0.04, 0.11)                      | 0.103                                               | 0.315               |
|                                 | ↑LDLCx↓HDL           | 0.02 (-0.06, 0.10)                        | 0.044                                                 | 0.612               | 0.01 (-0.06, 0.09)                      | 0.031                                               | 0.702               |
|                                 | ↑TGx↑LDLCx↓HDL       | -0.08 (-0.20, 0.04)                       | -0.149                                                | 0.191               | -0.07 (-0.18, 0.04)                     | -0.139                                              | 0.198               |

The adjusted  $\beta$  coefficient resulted from the linear models adjusted for all the covariates (age, gender, tobacco smoking, alcohol use, physical activity, and caloric intake).
